# Supplementary material for: Effect of Ginseng Powder Supplementation on the Physicochemical Properties, Antioxidant Capacity, and Sensory Characteristics of Cream Soup
Source: MDPI journal article supplement (doi:10.3390/foods11091193), 2022-04-20
Supplement: s1 [file s1]

**Table S1.** The formula for cream soup preparation added with ginseng powder

(unit : g)

| Ingredients              | Control | GS3 | GS5 | GS7 | GS10 |
|--------------------------|---------|-----|-----|-----|------|
| Onion powder             | 2.7     | 2.7 | 2.7 | 2.7 | 2.7  |
| Garlic powder            | 1.8     | 1.8 | 1.8 | 1.8 | 1.8  |
| Cheeze powder            | 5       | 5   | 5   | 5   | 5    |
| Roux powder <sup>1</sup> | 55      | 52  | 50  | 48  | 45   |
| Beef powder              | 3       | 3   | 3   | 3   | 3    |
| Milk powder              | 30      | 30  | 30  | 30  | 30   |
| Salt                     | 1       | 1   | 1   | 1   | 1    |
| White pepper             | 1       | 1   | 1   | 1   | 1    |
| Xanthan gum              | 0.5     | 0.5 | 0.5 | 0.5 | 0.5  |
| Ginseng powder           | 0       | 3   | 5   | 7   | 10   |
| Total                    | 100     | 100 | 100 | 100 | 100  |
| Water(mL)                | 300     | 300 | 300 | 300 | 300  |

Control: soup without ginseng powder, GS3: Soup with 3% ginseng powder, GS5: Soup with 5% ginseng powder, GS7: Soup with 7% ginseng powder, GS10: Soup with 10% ginseng powder.

**Table S2.** Proximate composition, quality, and antioxidant properties of ginseng powder

| Variables                                                |          | Ginseng powder |
|----------------------------------------------------------|----------|----------------|
| Moisture contents (%)                                    |          | 8.66±0.07      |
| Crude protein contents (%)                               |          | 12.25±0.04     |
| Crude fat contents (%)                                   |          | 2.23±0.05      |
| Crude ash contents (%)                                   |          | 3.66±0.01      |
| Carbohydrate contents (%)                                |          | 73.19±0.03     |
| DPPH Radical scavenging ability (%)                      |          | 40.82±1.43     |
| ABTS Radical scavenging ability (%)                      |          | 48.34±2.72     |
| Total polyphenol contents (mg Gallic acid Equiv./ g, DW) |          | 0.312±0.036    |
| Total flavonoid contents (mg Catechin Equiv./g, DW)      |          | 0.071±0.000    |
| pH                                                       |          | 5.46±0.01      |
| Total acidity (CA eq %)                                  |          | 3.737±0.185    |
| Total saponin (mg Diosgenin Equiv./g, DW)                |          | 43.045±5.141   |
| Chromaticity                                             | L* value | 86.37±0.30     |
|                                                          | a* value | -0.08±0.01     |
|                                                          | b* value | -14.66±0.13    |

All data are mean±SD of triplicate analyses. L\* value (lightness), ranges from black to white, a\* value (redness), ranges from green (negative) to red (positive), b\* value (yellowness), ranges from blue (negative) to yellow (positive).
